# Supplementary material
Source: HighWire-hosted journal article supplement (http://asnr-client.stage.highwire.org/highwire/filestream/181887/field_highwire_adjunct_files/0/3590_figures.pdf)
Supplement: 3590_figures.pdf [file 3590_figures.pdf]

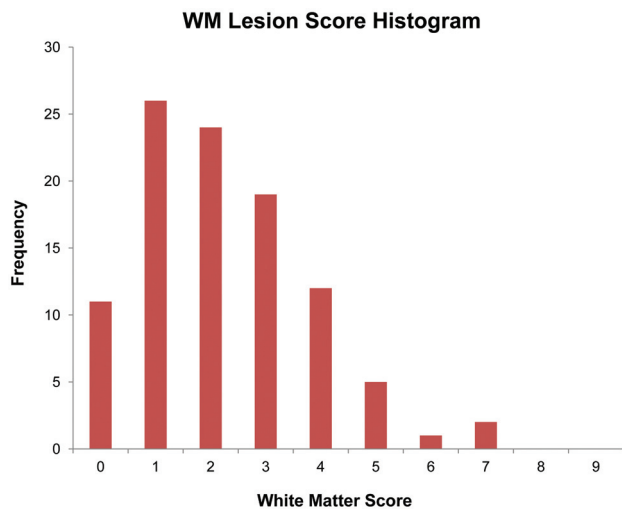

**ON-LINE FIG 1.** Histogram plot of average subjective WM lesion scores. Scores were skewed toward the lower end of the scale.

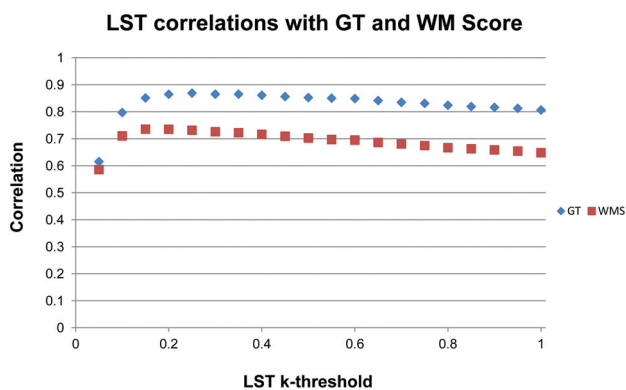

**ON-LINE FIG 2.** Lesion Segmentation Toolbox correlations with ground-truth and WM scores. LST  $k$ -threshold is on the x-axis, correlation on the y-axis. Maximum correlation at  $k = 0.25$  for GT (blue) and  $k = 0.15$  for average WM scores (red).

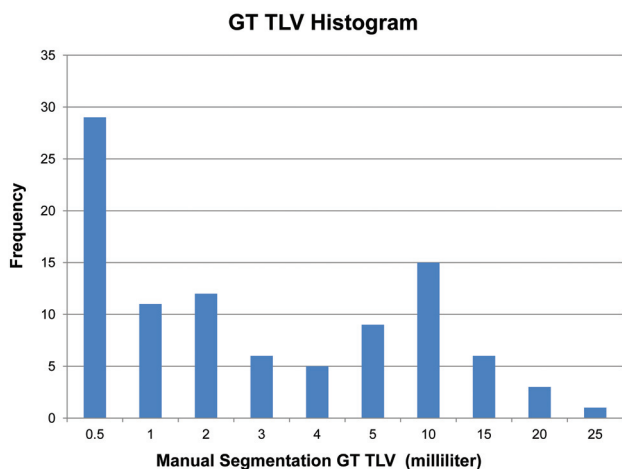

**ON-LINE FIG 3.** Ground truth total lesion volume histogram. Total lesion volume is skewed toward  $<1$  mL.

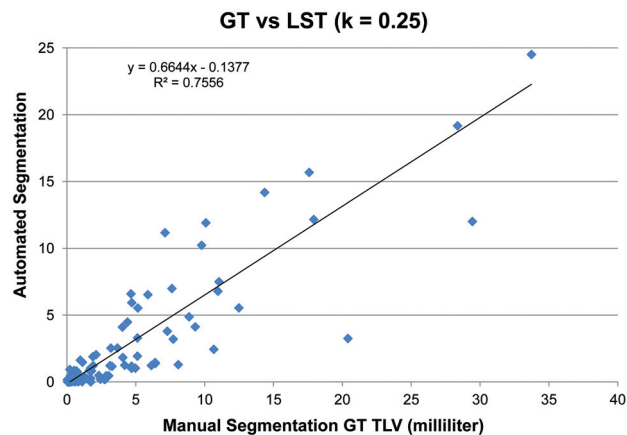

**ON-LINE FIG 4.** Ground-truth total lesion volume versus automated Lesion Segmentation Toolbox TLV at  $k = 0.25$ . A strong linear relationship around unity is demonstrated, with  $R^2 = 0.76$ .

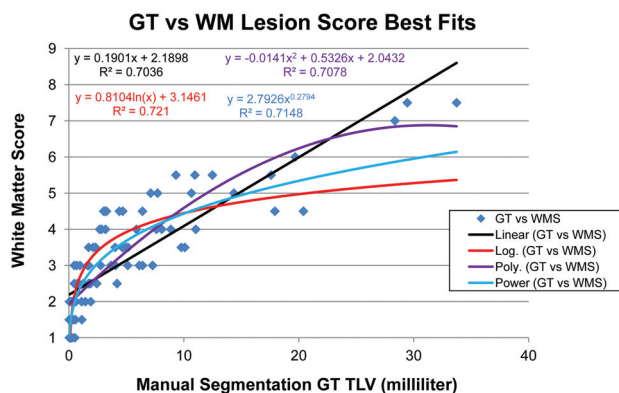

**ON-LINE FIG 5.** Ground-truth total lesion volume (milliliters) versus WM scores (1–10) demonstrating a nonlinear relationship. Better fits for log (red), polynomial (purple), and power law (blue) than linear (black) relationship. Best fit for log(GT TLV),  $R^2 = 0.72$ .
